# Supplementary material
Source: Research Square preprint supplement (doi:10.21203/rs.3.rs-9017508/v1)
Supplement: Supplementary file 1 [file e445a51f2f9457b4bae97adf.docx]

# **Supplementary File 1: Antimicrobial Use And Stewardship Questionnaire**

## **Personal Antimicrobial Use, Access, and Stewardship Awareness among Clinical Medical and Dental Students at the University of Nigeria Teaching Hospital, Enugu Campus (UNEC)**

### **Study Information**

You are invited to participate in a research study assessing antimicrobial stewardship knowledge, prescribing confidence, and clinical decision-making among clinical medical and dental students at the University of Nigeria Teaching Hospital, Enugu Campus (UNEC).

Participation in this survey is completely anonymous and voluntary. There are no right or wrong answers. Honest responses are essential for understanding training needs and improving medical education. Participants are strongly advised **not to use ChatGPT or other AI/LLM tools** when completing this survey.

The survey will take approximately **3–5 minutes** to complete. Responses will be analysed in aggregate for research purposes and potential publication.

For questions or concerns about this study, please contact the Principal Investigator at **+234 903 966 0878**.

## **Consent**

☐ I consent to participate in this study

☐ I do not consent to participate in this study

## **Section 1: Demographics and Training Background**

1. Age (years): ______
2. Sex:
   - ☐ Male
   - ☐ Female
3. Faculty:
   - ☐ Faculty of Dentistry
   - ☐ Faculty of Clinical Sciences
4. Level of study:
   - ☐ 400 Level (028)
   - ☐ 500 Level (027)
   - ☐ 500 Level (026)
   - ☐ 600 Level (025)
5. Clinical rotations completed (select all that apply):
   - ☐ Internal Medicine
   - ☐ Community Medicine
   - ☐ Surgery
   - ☐ Paediatrics
   - ☐ Obstetrics and Gynaecology
   - ☐ Psychiatry
   - ☐ Dermatology
   - ☐ Ophthalmology
   - ☐ Family Medicine
   - ☐ Other: ____________________

## **Section 2: Antimicrobial Stewardship Knowledge**

*Please select the single best answer for each question.*

1. Antibiotics are **most appropriate** when:
   - ☐ A patient has a viral upper respiratory infection
   - ☐ A patient has confirmed or strongly suspected bacterial infection
   - ☐ A patient has fever of unknown origin for less than 24 hours
   - ☐ A patient requests antibiotics
   - ☐ I do not know
2. Empiric antibiotic therapy refers to:
   - ☐ Antibiotics chosen after culture results are available
   - ☐ Antibiotics chosen based on clinical judgment before culture results return
   - ☐ Use of the narrowest-spectrum antibiotic
   - ☐ Antibiotic use without indication
   - ☐ I do not know
3. The **most important reason** to de-escalate antibiotics is to:
   - ☐ Reduce drug cost
   - ☐ Prevent antimicrobial resistance
   - ☐ Shorten hospital stay
   - ☐ Improve patient satisfaction
   - ☐ I do not know
4. For most uncomplicated bacterial infections, antibiotic duration should:
   - ☐ Always be at least 14 days
   - ☐ Be as long as possible
   - ☐ Follow evidence-based recommended durations
   - ☐ Continue until all symptoms disappear
   - ☐ I do not know
5. Which practice **most contributes** to antimicrobial resistance?

- ☐ Narrow-spectrum antibiotic use
- ☐ Short-course therapy
- ☐ Unnecessary antibiotic prescribing
- ☐ Culture-guided therapy
- ☐ I do not know

1. Which of the following is a **core principle** of antimicrobial stewardship?

- ☐ Prescribing antibiotics for all febrile patients
- ☐ Using the broadest-spectrum antibiotic available
- ☐ Right drug, right dose, right duration, right patient
- ☐ Avoiding cultures
- ☐ I do not know

## **Section 3: Antimicrobial Stewardship Behaviour**

### **Section 3A: Personal Use**

1. In the past 12 months, have you personally taken any antibiotics (oral, injectable, or topical)?

- ☐ Yes
- ☐ No

### **Section 3B: Details of Antibiotic Use**

1. How many separate times have you taken antibiotics in the past 12 months? ______
2. For the most recent episode, what was the main reason for antibiotic use?

- ☐ Respiratory symptoms (cough, sore throat)
- ☐ Urinary symptoms
- ☐ Skin infection
- ☐ Fever of unknown cause
- ☐ Post-surgery prophylaxis
- ☐ Prophylactic use
- ☐ Diarrhoea
- ☐ Suspected malaria
- ☐ Other: ____________________

1. Did you start the antibiotics based on a clinician’s prescription?

- ☐ Yes — prescribed by a doctor/clinician
- ☐ Yes — prescribed by a pharmacist without doctor consultation
- ☐ No — self-medication using previous prescription
- ☐ No — purchased over-the-counter without prescription
- ☐ No — used leftover antibiotics at home
- ☐ Other: ____________________

1. Where did you obtain the antibiotics for the most recent episode?

- ☐ Hospital or clinic pharmacy
- ☐ Patent medicine vendor
- ☐ Friends or family
- ☐ Leftover from previous treatment at home
- ☐ I do not remember
- ☐ Other: ____________________

1. Who advised or recommended antibiotic use? (select all that apply)

- ☐ Health professional (doctor, pharmacist, nurse)
- ☐ Friends or family
- ☐ Self-decision
- ☐ Other: ____________________

1. Did you undergo any diagnostic test before starting antibiotics?

- ☐ Yes — culture taken
- ☐ Yes — rapid diagnostic test (e.g., malaria RDT)
- ☐ No — no tests performed
- ☐ Not sure

1. Did you complete the full antibiotic course as directed?

- ☐ Yes — completed full course
- ☐ No — stopped early when symptoms improved
- ☐ No — stopped due to side effects
- ☐ No — altered dose independently
- ☐ Not applicable
- ☐ I cannot remember

1. If you stopped early or altered the dose, why?

- ☐ Felt better before end of course
- ☐ Side effects
- ☐ Could not afford medication
- ☐ Ran out of medicine
- ☐ Advised by someone to stop
- ☐ Symptoms worsened
- ☐ Other: ____________________

1. Have you ever used antibiotics to treat malaria or presumed malaria?

- ☐ Yes — frequently
- ☐ Yes — occasionally
- ☐ No
- ☐ Not sure

1. Have you ever shared antibiotics with others or used someone else’s antibiotics?

- ☐ Yes — shared
- ☐ Yes — used someone else’s
- ☐ No
- ☐ Other: ____________________

1. How often do you purchase antibiotics without prescription?

- ☐ Never
- ☐ Rarely
- ☐ Sometimes
- ☐ Often
- ☐ Always
- ☐ Not applicable

1. Do you keep leftover antibiotics at home for future use?

- ☐ Yes — always
- ☐ Yes — sometimes
- ☐ No — never
- ☐ I do not know

1. How do you usually dispose of leftover antibiotics?

- ☐ Household trash
- ☐ Flush in toilet or sink
- ☐ Keep for future use
- ☐ Return to pharmacy
- ☐ Dispose at hospital or clinic
- ☐ Not applicable
- ☐ Other: ____________________

1. Have you experienced side effects from antibiotic use in the past 12 months?

- ☐ Yes — minor
- ☐ Yes — moderate (required outpatient care)
- ☐ Yes — severe (required hospital admission)
- ☐ No
- ☐ I do not remember

1. Do you believe that taking antibiotics without prescription increases the risk of antimicrobial resistance?

- ☐ Yes
- ☐ No
- ☐ Maybe

1. If you obtained antibiotics without prescription, what was the main reason?

- ☐ Cheaper
- ☐ Faster
- ☐ Clinician not available
- ☐ Thought I knew the cause
- ☐ Clinic visit unnecessary
- ☐ Advised by pharmacy staff
- ☐ Not applicable

## **Section 4: Stewardship Teaching and Exposure**

1. Have you received formal teaching on antimicrobial stewardship?

- ☐ Yes
- ☐ No
- ☐ Maybe

1. Approximate hours of stewardship teaching received:

- ☐ None
- ☐ 1–2 hours
- ☐ 3–5 hours
- ☐ More than 5 hours

1. Main source of stewardship learning (select all that apply):

- ☐ Lectures
- ☐ Bedside teaching
- ☐ Clinical ward rounds
- ☐ Self-study
- ☐ Online resources

1. Have you previously participated in any antimicrobial stewardship activity?

- ☐ Yes
- ☐ No
- ☐ Maybe

1. Would you attend additional antimicrobial stewardship training if offered?

- ☐ Definitely
- ☐ Probably
- ☐ Maybe
- ☐ Probably not
- ☐ Definitely not

1. Preferred training format (select up to two):

- ☐ Short in-person workshop
- ☐ Recurrent bedside AMS rounds
- ☐ Online self-paced course
- ☐ Case-based small group sessions
- ☐ Simulation-based training
- ☐ Pocket guideline app
- ☐ Mentored ward rounds with microbiology

1. Are you aware of hospital antibiotic prescribing guidelines?

- ☐ Yes
- ☐ No
- ☐ Maybe

**End of Questionnaire**
